# Supplementary material for: Omics data reveal the unusual asexual-fruiting nature and secondary metabolic potentials of the medicinal fungus Cordyceps cicadae
Source: BMC Genomics. 2017 Aug 30;18:668. doi: 10.1186/s12864-017-4060-4 (PMC5577849; doi:10.1186/s12864-017-4060-4)
Supplement: Supplementary file 2 — Relative quantification of the metabolites produced by C. cicadae at different developmental stages. (XLSX 31 kb) [file 12864_2017_4060_MOESM2_ESM.xlsx]

## Sheet: 1
Relative quantification of the metabolites produced by C. cicadae at different developmental stages.
Ionization mode	Detected mass	RT (min)	Molecular formula	Metabolite	Myc-1	Myc-2	Myc-3	Myc-4	Myc-5	Pri-1	Pri-2	Pri-3	Pri-4	Pri-5	Str-1	Str-2	Str-3	Str-4	Str-5
ESI+,ESI-	85.052	1.73	C4H7NO	Butyrolactam	0.0332798	0.0295778	0.00965197	0.0358398	0.0190814	ND	0.00718151	ND	ND	0.00560451	ND	ND	ND	ND	ND
ESI-	89.9954	2	C2H2O4	Oxalic acid	0.014951	0.0372852	0.0181749	0.0264748	0.00935177	0.0710067	0.0866926	0.0571792	0.0591702	0.071739	0.0492866	0.0763907	0.0790564	0.0766438	0.0650526
ESI+	93.0577	1.78	C6H7N	2-Methylpyridine	0.00642769	ND	ND	ND	ND	0.0137626	ND	ND	0.0110531	ND	ND	ND	ND	ND	ND
ESI-	103.063	1.73	C4H9NO2	GABA (γ-aminobutyric acid)	0.138724	0.163237	0.0716323	0.146418	0.0904023	0.108316	0.131091	0.154927	0.100313	0.113005	0.109794	0.103828	0.108847	0.0964477	0.105947
ESI+	115.063	1.79	C5H9NO2	Proline	0.211226	0.14828	0.140786	0.13686	0.105307	0.0898449	0.125827	0.0808941	0.201212	0.0548604	0.0904695	0.0660904	0.116328	0.0882126	0.0588772
ESI-	116.01	2.06	C4H4O4	Fumaric acid	ND	ND	ND	ND	ND	0.0070801	ND	ND	0.00835636	0.00593232	0.043615	0.0342974	0.034384	0.031912	0.0385235
ESI+	117.079	1.81	C5H11NO2	Betaine	0.688597	1.2319	0.799511	0.840852	0.807361	2.49788	2.38603	2.3729	2.42389	2.46256	2.22242	2.01421	2.20759	2.41552	1.98106
ESI+	118.038	2.49	C3H6N2O3	Hydroxypropanedioic acid; diamide	0.139553	0.0954353	0.0929171	0.0647085	0.0999268	0.445356	0.342555	0.356823	0.208527	0.313497	0.311377	0.330776	0.386132	0.249165	0.331376
ESI-	119.058	1.72	C4H9NO3	Threonine	0.0312678	0.0146176	ND	0.0114858	ND	0.0572397	0.122174	0.0836184	0.0652895	0.0864026	0.0919407	0.0899983	0.04841	0.0789769	0.09477
ESI-	123.032	4.54	C6H5NO2	Nicotinic acid	ND	ND	ND	ND	ND	ND	ND	ND	ND	ND	ND	ND	ND	ND	ND
ESI+	125.056	2.46	C5H7N3O	Methylcytosine	0.0811951	0.176071	0.12808	0.0981059	0.0639737	0.248392	0.2614	0.223064	0.251527	0.211218	0.165705	0.178235	0.233062	0.162974	0.171547
ESI-	129.042	1.76	C5H7NO3	5-Oxoproline; pyroglutamic acid	0.0302941	0.0328545	ND	0.0317008	ND	ND	0.0298766	0.0320922	ND	ND	ND	ND	ND	ND	0.0244054
ESI-	132.09	1.63	C5H12N2O2	Ornithine	0.0505548	0.047118	0.0296601	0.0413803	0.019594	0.052306	0.0313633	0.0348287	0.0354859	0.0318986	0.0284559	0.023195	0.0358342	0.0199424	0.0268623
ESI+	134.056	2.49	C5H10O4	2,3-Dihydroxy-valeric acid	0.00642769	0.0114545	0.0234884	0.0106857	ND	0.0631175	0.0708518	0.0582057	0.086978	0.0797541	0.0239529	0.0273877	0.02874	0.0230435	0.0243304
ESI+	137.048	1.79	C7H7NO2	p-Aminobenzoic acid	0.00642769	ND	ND	ND	ND	0.13932	ND	0.116847	ND	0.113987	ND	ND	ND	ND	ND
ESI+	143.07	1.55	C5H9N3O2	2-Amino-4,5-dihydro-1H-imidazole-4-acetic acid	0.118032	0.0620767	0.0373618	0.0879916	0.0996794	0.266984	0.188853	0.220182	0.198601	0.212421	0.19979	0.228747	0.205093	0.186819	0.206786
ESI+	143.073	11.49	C10H9N	2-Methylquinoline	0.00642769	ND	ND	ND	ND	ND	ND	ND	ND	ND	ND	ND	ND	ND	ND
ESI+	143.106	1.74	C6H13N3O	(4-Hydroxy-3-methyl-2-butenyl)guanidine	0.243089	0.336099	0.275647	0.28447	0.1672	0.00526962	0.00512437	0.00502611	0.00512154	0.00516398	0.169449	0.1598	0.0869749	0.137167	0.13928
ESI+	145.11	1.77	C7H15NO2	Acetylcholine	0.00642769	ND	ND	ND	ND	0.572412	0.821914	0.993854	0.939304	1.12811	0.471074	0.364816	0.672183	0.48207	0.346869
ESI-	146.021	2.55	C5H6O5	α-Ketoglutaric acid	ND	0.055726	ND	ND	ND	ND	ND	ND	ND	ND	ND	ND	ND	0.00553139	ND
ESI-	146.069	1.71	C5H10N2O3	Glutamine	0.0519205	0.0222513	ND	0.0466077	0.00785307	0.2001	0.131498	0.103425	0.122996	0.120496	0.153707	0.168364	0.170908	0.16758	0.150832
ESI-	146.105	1.64	C6H14N2O2	Lysine	0.0221168	0.0234026	0.0282128	0.0205938	0.0169941	0.037435	0.0310853	0.0350823	0.0369065	0.0348152	0.116449	0.112117	0.0805617	0.0843942	0.114639
ESI-	147.053	1.74	C5H9NO4	Glutamic acid	0.250229	0.289042	0.133335	0.260458	0.147871	0.192951	0.221479	0.245358	0.185204	0.203458	0.195001	0.183039	0.190734	0.169713	0.188017
ESI-	154.098	17.37	C9H14O2	2,6-Dimethyl-2,5-heptadienoic acid	0.0127915	0.0175841	0.0122831	0.0154498	0.0208863	ND	ND	ND	ND	ND	ND	ND	ND	ND	ND
ESI+	155.035	1.76	C3H10NO4P	N-Methylethanolamine phosphate	0.00642769	ND	ND	ND	ND	0.0689846	0.197508	0.123705	0.12238	0.178396	ND	ND	0.0161327	0.0111366	ND
ESI-	156.115	17.37	C9H16O2	3-Methyloctane-2,4-dione	0.0279336	0.0382651	0.0248169	0.0341361	0.0472238	0.115448	0.0947882	0.0607433	0.109905	0.10527	ND	ND	ND	ND	ND
ESI-	158.057	2.82	C7H10O4	(4R,6R)-3,4,6-trihydroxy-2-methylcyclohex-2-enone	ND	ND	ND	ND	ND	ND	ND	ND	ND	ND	ND	ND	ND	ND	ND
ESI+	161.07	2.89	C6H11NO4	Methylglutamic acid	0.0425222	0.0296498	0.011635	0.0288679	0.00850978	0.0537363	0.0294767	0.0157698	0.0276221	0.0468197	0.0798551	0.0717161	0.126863	0.0796756	0.0727542
ESI+	161.105	1.75	C7H15NO3	Carnitine	0.0243625	0.0287423	0.0250147	0.0226283	0.0181622	0.730257	0.697003	0.674348	0.617508	0.624769	0.381052	0.268934	0.378688	0.242038	0.248313
ESI-	165.079	3.99	C9H11NO2	Phenylalanine	0.0123166	0.0269001	0.013935	0.0133659	ND	0.0363534	0.0321681	0.0298537	0.0308612	0.0317712	0.0402056	0.0361592	0.033174	0.0318762	0.0451802
ESI+	171.101	1.73	C7H13N3O2	6-Amino-1,4-diazacyclononane-2,5-dione	0.633853	0.0213438	0.0181471	0.0185939	0.011275	0.14693	0.0346164	0.0281627	0.0554111	0.0441876	0.012362	0.0119761	ND	ND	0.277737
ESI+	171.105	13.31	C12H13N	2-Propylquinoline	0.00642769	ND	ND	ND	ND	ND	ND	ND	ND	ND	ND	ND	ND	ND	ND
ESI-	174.111	1.64	C6H14N4O2	Arginine	0.102093	0.0993394	0.0590395	0.0873686	0.0412556	0.0896165	0.0399083	0.0498777	0.0547139	0.0460961	0.0397598	0.0290035	0.0446182	0.0279548	0.0352603
ESI-	180.062	1.81	C6H12O6	Inositol	0.0159079	0.114557	0.0220547	0.015071	0.136342	ND	ND	ND	ND	ND	ND	ND	ND	ND	ND
ESI+	180.089	4.27	C9H12N2O2	p-Aminophenylalanine	0.00642769	ND	ND	ND	ND	ND	ND	ND	ND	ND	ND	ND	ND	ND	ND
ESI-	182.078	1.77	C6H14O6	D-mannitol	0.115848	0.114557	ND	0.11094	ND	0.119445	0.16628	0.264217	0.105634	0.213056	0.228698	0.231792	0.279013	0.203192	0.280056
ESI-	182.105	11.75	C9H14N2O2	3-Methylene-6-(1-methylpropyl)-2,5-piperazinedione	ND	ND	ND	ND	ND	ND	ND	ND	ND	ND	ND	ND	ND	ND	ND
ESI+	183.057	1.81	C5H13NO4S	Choline sulfate	0.481948	0.515471	0.550619	0.4482	0.293808	0.391219	0.344722	0.430445	0.360686	0.330216	0.345403	0.387113	0.393669	0.300966	0.399888
ESI-	188.127	1.67	C9H14N2O2	Methylarginine	0.0914232	0.115382	0.173861	0.099627	0.0951147	0.0350101	0.00945227	0.00727221	0.0130156	0.0109378	0.0817137	0.0601443	0.0323782	0.0454482	0.0397739
ESI-	192.016	2.48	C8H4N2O4	Phthalimide; N-nitro	0.867521	ND	ND	ND	ND	ND	ND	ND	ND	0.586863	1.74285	1.7373	1.61075	0.809374	0.839295
ESI-	196.058	1.76	C6H12O7	Gluconic acid	ND	ND	ND	ND	ND	0.441867	0.349304	0.354859	0.449815	0.362828	0.0979783	0.0362949	0.0759132	0.0651738	0.0328634
ESI+	197.117	1.67	C9H15N3O2	Hercynine	0.14336	0.327599	0.178094	0.232647	0.105108	0.051455	0.0341287	0.0579022	0.0482332	0.0861128	0.0762681	0.0810872	0.0394162	0.101455	0.0956776
ESI-	200.079	2.56	C8H12N2O4	Clavalanine	ND	ND	ND	ND	ND	ND	ND	ND	ND	ND	ND	ND	ND	ND	ND
ESI-	200.104	17.37	C10H16O4	10-Membered macrolide (from Cordyceps militaris)	0.00351401	0.00354147	0.00360185	0.00341976	0.00351288	0.0544146	0.0423049	0.0346605	0.0632254	0.0627114	0.00266129	0.00251422	0.00242108	0.00235753	0.00220393
ESI+	208.002	1.64	C9H4O6	Stipitatonic acid	0.00642769	0.00524676	0.00472945	0.00496095	0.00415275	0.0127131	0.0141241	0.0152311	0.0115611	0.0117829	0.00534841	0.00519854	0.0107951	0.00541722	0.00513229
ESI+	210.11	1.72	C8H18O6	Rhamnose; L-form, Di-Me acetal	0.0930017	0.110029	0.154137	0.0998954	0.0660779	ND	ND	ND	ND	ND	ND	ND	ND	ND	ND
ESI+	212.153	15.49	C11H20N2O2	3-Isopropyl-6-isobutyl-2,5-dioxopiperazine	0.00642769	ND	ND	ND	ND	ND	ND	ND	ND	ND	ND	ND	ND	ND	ND
ESI-	215.055	1.73	C5H14NO6P	Glycerylphosphorylethanolamine	0.00901053	ND	ND	ND	ND	0.0281749	0.0209485	0.00973099	0.0181894	0.0185245	0.0501432	0.0362496	0.0510857	0.0393682	0.0370598
ESI+	217.131	2.78	C10H19NO4	Propionylcarnitine	0.00642769	ND	ND	ND	ND	0.145752	0.193064	0.133711	0.202656	0.189081	0.0445359	0.0192827	0.0174309	0.0287521	0.0267103
ESI-	222.085	17.37	C7H14N2O6	Unknown-1	0.0152517	0.0193343	0.0133978	0.0170605	0.0213737	0.0398878	0.0353074	0.0257704	0.0376669	0.0362616	ND	ND	ND	ND	ND
ESI+	224.153	4.93	C12H20N2O2	Aspergillic acid	0.00642769	ND	ND	ND	ND	ND	ND	ND	ND	ND	ND	ND	ND	ND	ND
ESI+	226.132	11.88	C11H18N2O3	Cordysinin A	0.0192741	0.00524676	0.00472945	0.00496095	0.00415275	ND	ND	ND	ND	ND	ND	ND	ND	ND	ND
ESI+	226.169	17.21	C12H22N2O2	Cyclo(leucylleucyl)	0.00642769	ND	ND	ND	ND	ND	ND	ND	ND	ND	ND	ND	ND	ND	ND
ESI+	227.095	13.31	C14H13NO2	Sinensine B	0.00642769	ND	ND	ND	ND	ND	ND	ND	ND	ND	ND	ND	ND	ND	ND
ESI+	228.147	2.51	C11H20N2O3	Aspergilliamide	ND	ND	ND	ND	ND	0.00526962	0.00512437	0.00502611	0.00512154	0.00516398	ND	ND	ND	ND	ND
ESI+	234.112	2.47	C10H18O6	3,6-Dihydroxy-2,7-dimethyloctanedioic acid	0.045837	0.0259201	0.0284637	0.028857	0.0260151	ND	ND	ND	ND	ND	ND	ND	ND	ND	ND
ESI-	242.126	12	C11H18N2O4	Cyclo(glutamylleucyl)	0.0117532	ND	ND	ND	ND	ND	ND	ND	ND	ND	ND	ND	ND	ND	ND
ESI+	245.163	11.22	C12H23NO4	Pivaloylcarnitine	0.00642769	ND	ND	ND	ND	0.129851	0.0916793	0.117428	0.152405	0.125863	0.0131534	0.0110884	0.014944	0.014005	0.0142906
ESI+	250.143	3.09	C11H22O6	3-Methyl-1-butanol; O-glucopyranoside	0.0155917	ND	ND	ND	ND	ND	ND	ND	ND	ND	ND	ND	ND	ND	ND
ESI+	255.169	3.23	C11H21N5O2	Unknown-2	0.0179759	0.014816	0.0114477	0.0172468	0.0107003	ND	ND	ND	ND	ND	ND	ND	ND	ND	ND
ESI+	257.103	1.77	C8H20NO6P	Glycerophosphocholine	0.0374274	ND	0.034032	ND	ND	0.0851169	0.0147809	ND	0.0178481	0.0128846	0.488655	0.414364	0.129196	0.447434	0.23571
ESI+	260.115	13.39	C14H16N2O3	Cyclo(4-hydroxyprolylphenylalanyl)	0.00642769	ND	ND	ND	ND	ND	ND	ND	ND	ND	ND	ND	ND	ND	ND
ESI+	264.09	13.81	C16H12N2O2	Perlolyrine	0.00642769	ND	ND	ND	ND	ND	ND	ND	ND	ND	ND	ND	ND	ND	ND
ESI+	275.137	2.77	C12H21NO6	1-Amino-1,2,3-propanetricarboxylic acid; tri-Et ester	0.0468485	0.0415135	0.0315174	0.0402847	0.0235937	ND	ND	ND	ND	ND	ND	ND	ND	ND	ND
ESI-	276.132	1.73	C11H20N2O6	Saccharopine	ND	ND	ND	ND	ND	0.0115562	0.00798084	0.00970429	0.00975188	0.00917893	0.0618099	0.0554818	0.0425688	0.047605	0.0516422
ESI+	280.142	5.09	C14H20N2O4	Valyl-Tyrosine	0.00642769	ND	ND	ND	ND	0.119466	0.148101	0.103056	0.131264	0.148487	0.021476	0.0215072	0.0147449	0.044448	0.0176546
ESI-	280.24	34.06	C18H32O2	Linoleic acid	0.117568	0.0410093	0.100335	0.045012	0.121237	0.329055	0.245471	0.19111	0.316734	0.260741	0.132817	0.133876	0.136985	0.154583	0.14221
ESI-	280.24	26.72	C18H32O2	2,6-Octadecadienoic acid	0.0149229	0.0196713	0.0399328	0.00708701	0.0337144	0.0547113	0.0489872	0.0618432	0.0646508	0.0751892	0.0778244	0.0743993	0.0877398	0.0791513	0.0687934
ESI-	287.043	14.22	C14H9NO6	Antibiotic SB 236049	ND	ND	ND	ND	ND	ND	ND	ND	ND	ND	ND	ND	ND	ND	ND
ESI+	290.136	4.02	C13H22O7	1-Hydroxy-1,2,4-butanetricarboxylic acid;Tri-Et ester	0.00642769	0.0240579	ND	0.0178578	ND	0.0659404	0.0556478	0.040632	0.0596468	0.104003	ND	0.0155915	0.0166707	0.0157577	0.017122
ESI-	291.095	1.9	C11H17NO8	Neodysiherbaine A	ND	ND	ND	ND	ND	ND	ND	ND	ND	ND	ND	ND	ND	ND	ND
ESI+	295.059	1.72	C8H14N3O7P	5-Aminoimidazole ribonucleotide	0.00642769	ND	ND	ND	ND	0.0747547	0.0296406	ND	0.0247188	0.0253986	0.139012	0.134081	0.0624954	0.118179	0.100765
ESI-	295.142	16.57	C15H21NO5	Cycloheximide acid A	0.00351401	ND	ND	ND	0.00351288	0.00349947	0.00345869	0.00333844	0.00298561	0.00272384	0.0147589	0.0219203	0.0584516	0.014543	0.0238309
ESI-	296.235	28.09	C18H32O3	8-Oxo-9(E)-octadecenoic acid	0.0209042	ND	0.00767751	ND	0.0192499	0.0133864	ND	0.0102169	0.00935793	0.00800052	ND	0.00552506	0.00672501	0.00928873	ND
ESI+,ESI-	305.053	14.19	C14H11NO7	2-[2-(2,5-Dihydroxybenzoyl)amino]-3,4-dihydroxybenzoic acid	0.00941377	ND	ND	ND	ND	ND	ND	ND	ND	ND	ND	ND	ND	ND	ND
ESI-	306.037	13.95	C14H10O8	Oosporein	0.0858354	0.0118025	0.0334924	0.00741381	0.00351288	0.00349947	0.00345869	0.00333844	0.00298561	0.00272384	0.00266129	0.00251422	0.00242108	0.00235753	0.00220393
ESI+	311.123	3.93	C12H17N5O5	N6-(2-Hydroxyethyl) adenosine	0.211307	0.0901581	0.055682	0.0927233	0.0653853	0.149505	0.108962	0.130842	0.0962154	0.224832	0.0411692	0.0829095	0.0663138	0.0846368	0.0146539
ESI-	317.09	18.72	C16H15NO6	5-(3,5-Dimethoxybenzamido)-2-hydroxybenzoic acid	ND	ND	ND	ND	ND	0.12155	0.0689442	0.0933414	0.076019	0.0902874	0.153794	0.127363	0.0730139	0.0575998	0.109483
ESI+	317.294	21.75	C18H39NO3	Phytosphingosine	1.46588	1.55433	1.43674	1.32173	1.19588	1.51314	1.80923	1.69449	1.57386	1.68869	1.59414	1.67346	1.58197	1.54907	1.58743
ESI+	319.083	22.08	C15H9N7O2	Unknown-3	0.925879	0.595826	0.665725	0.700581	0.732605	0.729536	0.732172	0.765095	0.777619	0.782683	0.8122	0.830674	0.824642	0.843416	0.841881
ESI-	319.105	16.61	C16H17NO6	1-Hydroxy-4-(2-((2-methoxyethyl)amino)-2-oxoethoxy)-2-naphthoic acid	ND	ND	ND	ND	ND	0.00933286	ND	ND	ND	ND	0.0199304	0.017882	0.00978598	0.00806142	0.0156329
ESI+	324.209	34.47	C22H28O2	7,10,13,16-Docosatetraynoic acid	0.00642769	ND	ND	ND	ND	0.0201881	ND	ND	ND	ND	ND	0.161844	0.166593	0.180997	0.208108
ESI-	326.063	18.04	C14H14O9	Sinapoyltartronate	ND	ND	ND	ND	ND	ND	ND	ND	ND	ND	ND	ND	ND	ND	ND
ESI+	333.084	2.82	C16H15NO7	Fumimycin	0.0436083	0.0485669	0.029591	0.0409781	0.0157939	0.0817661	0.0362948	0.0184723	0.0322828	0.0290994	0.204536	0.166711	0.287021	0.203877	0.168514
ESI+	334.251	25.23	C21H34O3	17Beta-Hydroxy-2alpha-(hydroxymethyl)-17-methyl-5alpha-androstan-3-one	0.00642769	ND	ND	ND	ND	0.122903	0.115524	0.119757	0.11807	0.120973	0.0177927	0.0162193	0.0307931	0.0184452	0.010944
ESI+	336.267	26.83	C21H36O3	Betaenone H	0.199419	0.324398	0.750817	0.193574	0.732695	1.31738	1.22606	1.14452	1.03971	1.17635	1.06178	1.17625	1.17634	1.10148	0.899925
ESI+	337.175	4.63	C15H23N5O4	Tyr-Arg	0.00642769	ND	ND	ND	0.0100917	0.0291341	ND	ND	ND	ND	0.0365598	0.041238	0.0599971	0.0543346	0.0378031
ESI+	354.278	32.42	C21H38O4	MG(18:2/0:0）	0.187025	0.0743979	0.295372	0.12088	0.45659	0.186461	0.173457	0.0967945	0.0928656	0.164744	0.182677	0.104465	0.107935	0.178295	0.149126
ESI+	356.293	34.58	C21H40O4	MG(18:1/0:0)	0.0442227	0.0112206	0.0524713	ND	0.0863384	0.103113	0.0295843	ND	0.0106926	0.0152699	0.0671712	0.0600852	0.0881761	0.0898796	0.0967613
ESI+	383.388	21.99	C23H49N3O	N',N'',N''-Trimethyl-N-(3-methyl-2,4-dodecadienoyl)spermidine;2,3,4,5-tetrahydro	0.00642769	ND	ND	ND	ND	0.252152	0.157678	0.126849	0.181929	0.107741	0.155762	0.0143846	0.104647	0.0815962	0.117793
ESI-	397.046	17.45	C12H15NO14	Unknown-4	ND	ND	ND	ND	ND	0.0230117	0.0199569	0.0199759	0.0199777	0.0235409	0.0526832	0.0476777	0.0366231	0.0188867	0.0497749
ESI+	407.388	21.46	C25H49N3O	N',N'',N''-Trimethyl-N-(5-methyl-2,4-tetradecadienoyl)spermidine	0.00642769	ND	0.0197122	ND	0.0103665	0.0435479	0.042035	0.0541103	0.0345245	0.062357	0.0543087	0.0660467	0.0754395	0.0396331	0.0714611
ESI-	434.243	26.95	C21H39O7P	LPA(18:2/0:0)	ND	ND	ND	0.0157574	0.00808763	0.0619369	0.0839281	0.136513	0.108762	0.110366	0.0472052	0.0490268	0.0607768	0.0578892	0.0304585
ESI+,ESI-	439.184	12.46	C22H25N5O5	unknown-5	ND	ND	ND	ND	ND	ND	ND	ND	ND	ND	0.0960991	0.054758	0.034386	0.00780503	0.0805868
ESI+	451.27	25.65	C21H42NO7P	LPE(16:1/0:0)	0.00642769	ND	0.0234496	ND	0.0128328	0.0752752	0.0711029	0.0627394	0.0519906	0.0707138	0.0140015	0.0126705	0.0304969	0.0145651	0.0143809
ESI-	453.285	27.71	C21H44NO7P	LPE(16:0/0:0)	0.031213	0.0253496	0.089303	0.0344205	0.0157286	0.0365395	0.0892012	0.39346	0.0840507	0.0710104	0.0931378	0.126358	0.113031	0.110862	0.125268
ESI-	475.27	25.35	C23H42NO7P	LPE(18:3/0:0)	ND	ND	0.0284691	ND	0.0106103	0.595078	0.620874	0.624364	0.556727	0.583986	0.0905286	0.0870759	0.106107	0.0928223	0.0708264
ESI+,ESI-	477.285	26.68	C23H44NO7P	LPE(18:2/0:0)	0.96709	1.24588	2.27923	0.890283	2.11399	3.06658	2.93956	2.78787	2.63648	2.5351	2.57272	2.44658	2.58694	2.49217	2.15826
ESI+,ESI-	479.301	28.42	C23H46NO7P	LPE(18:1/0:0)	0.0519865	0.0559554	0.11827	0.0234009	0.244213	0.453815	0.443569	0.448844	0.331263	0.409124	0.313027	0.241126	0.38863	0.351098	0.218145
ESI+,ESI-	481.317	30.77	C23H48NO7P	LPE(18:0/0:0)	ND	ND	ND	ND	ND	0.00729978	0.0110482	0.0493944	0.0079863	0.00727192	0.0296732	0.0366186	0.0184219	0.0388385	0.028645
ESI+	493.317	26.23	C24H48NO7P	LPC(16:1/0:0)	0.0158899	0.0120872	0.0139737	ND	0.0289223	0.152871	0.12508	0.0876659	0.104237	0.13747	0.0455508	0.0438534	0.10897	0.0693828	0.0505101
ESI+	495.356	27.04	C28H49NO6	Unknown-6	0.00642769	ND	0.0438352	ND	0.0144844	0.219065	0.285365	0.271166	0.444813	0.363625	ND	ND	0.0221689	ND	ND
ESI+	497.372	28.71	C28H51NO6	Unknown-7	0.553222	0.495135	2.53137	0.420856	2.05975	1.95657	1.95351	1.86599	2.29746	2.47004	0.31082	0.305635	0.719589	0.302813	0.374862
ESI+	499.387	30.96	C28H53NO6	Unknown-8	0.00642769	ND	0.0308072	ND	0.0312308	0.147009	0.129812	0.141872	0.155491	0.172397	0.0374089	0.0297027	0.123227	0.0379877	0.0297644
ESI-	503.301	25.94	C25H46NO7P	LPE(20:3/0:0)	ND	ND	ND	ND	ND	0.446142	0.452271	0.405489	0.503767	0.477641	0.0612267	0.062366	0.0907311	0.0534701	0.0577535
ESI-	505.316	27.46	C25H48NO7P	LPE(20:2/0:0)	0.185718	0.319406	0.643907	0.2138	0.754295	1.3737	1.29958	ND	1.30055	1.36836	1.03626	0.997525	1.17304	1.115	0.98491
ESI+	517.317	25.72	C26H48NO7P	LPC(18:3/0:0)	0.00642769	ND	0.0139718	ND	0.0187484	1.26268	1.27982	1.14216	1.49891	1.69004	0.200823	0.193795	0.278946	0.259194	0.188442
ESI-	519.259	25.88	C24H42NO9P	LPS(18:3/0:0)	ND	ND	ND	ND	ND	0.0937708	0.0921869	0.0951341	0.0927604	0.0980756	0.00828714	0.00821721	0.0108925	0.0108978	0.00710529
ESI+	519.333	27.28	C26H50NO7P	LPC(18:2/0:0)	0.702865	0.899964	1.87992	0.65674	2.50278	4.45519	4.45894	4.10863	4.69626	4.47397	3.73545	4.69061	4.86189	3.77088	4.42541
ESI+,ESI-	521.275	27.53	C24H44NO9P	LPS(18:2/0:0)	0.103227	0.169254	0.459514	0.0785109	0.687012	1.98473	1.73937	1.7173	1.62388	1.97529	1.10808	1.08782	1.33239	1.19893	0.954949
ESI+	521.348	29.51	C26H52NO7P	LPC(18:1/0:0)	0.00642769	ND	ND	ND	0.0236975	0.157055	0.141747	0.112945	0.0981663	0.173172	0.162089	0.137781	0.249912	0.168636	0.0987574
ESI+	541.315	27.24	C28H48NO7P	LPC(20:5/0:0)	0.00642769	0.115265	0.228695	0.0732258	0.253901	0.35798	0.414745	0.694955	0.419051	0.776929	0.644297	0.359513	0.386955	0.378583	0.317547
ESI-	543.377	28.98	C29H53NO8	Unknown-9	0.0307128	0.0356681	0.274049	0.0278011	0.201955	0.173118	0.183238	0.172132	0.216359	0.212699	0.0130787	0.0134467	0.0573819	0.017797	0.0246381
ESI+	553.184	10.13	C16H33N4O17	Unknown-10	0.0187818	0.0489687	0.0466165	0.0437676	0.0639795	0.213691	0.158588	0.150243	0.194609	0.208058	0.0556744	0.0671278	0.100488	0.064895	0.0332055
ESI+	576.316	13.06	C28H48O12	Acylsucroses; 6-O-(7Z,10Z-hexadecadienoyl)	0.00642769	0.0172773	ND	0.0116956	ND	ND	ND	ND	ND	ND	ND	0.0118607	0.0129055	ND	ND
ESI+	578.286	27.21	C18H42N8O13	Unknown-11	0.0142191	0.0143733	0.0299617	0.0112274	0.0533597	0.227389	0.264619	0.234986	0.183549	0.245847	0.0825202	0.0797484	0.101068	0.0905935	0.0798117
ESI-	594.281	25.92	C27H47O12P	LPI(18:3/0:0)	ND	ND	ND	ND	ND	0.140508	0.163363	0.170303	0.155517	0.169347	0.0302266	0.0254921	0.042805	0.0344722	0.021248
ESI+,ESI-	596.296	27.33	C34H44O9	Tyr-Thr-Trp-Lys	0.184993	0.378101	0.667393	0.177983	1.11661	4.06154	4.11835	3.71076	3.28623	3.39734	1.78464	1.6635	2.15584	1.9382	0.568312
ESI-	598.312	29.34	C23H42N12O5S	Met-Arg-His-Arg	ND	ND	ND	ND	0.00737972	0.0699769	0.0680342	0.0560807	0.0457535	0.0707152	0.0511221	0.038036	0.102074	0.0693328	0.0361301
ESI+,ESI-	630.173	25.91	C34H30O12	Lichenicolin A	ND	ND	0.00360185	ND	ND	0.0698174	0.0349063	0.054938	0.0539427	0.0532526	0.0964588	0.0751944	0.0735076	0.0619547	0.0772787
ESI-	664.284	27.1	C21H44N8O16	Unknown-12	0.00747341	0.0121551	0.0214901	ND	0.0260875	0.0491661	0.0488558	0.0443714	0.0423715	0.0320587	0.0389968	0.036506	0.0382301	0.0362104	0.0315856
ESI+	735.41	33.82	C41H57N3O9	Beauvericin E	ND	ND	ND	ND	ND	ND	ND	ND	ND	ND	ND	ND	ND	ND	ND
ESI+	783.41	34.06	C45H57N3O9	Beauvericin	0.0734101	0.0722125	0.0612096	0.0239377	0.0417136	0.00526962	0.00512437	0.00502611	0.00512154	0.00516398	0.00534841	0.00519854	0.00521455	0.00541722	0.00513229
ESI+	797.425	34.67	C46H59N3O9	Beauvericin A	0.0206519	0.0143733	0.00472945	0.00496095	0.00415275	ND	ND	ND	ND	ND	ND	ND	ND	ND	ND
ND, not detected
